# Supplementary material for: Hybridization of preheated cellulose microcrystals with MoS 2 sheets for enhanced piezo-catalytic hydrogen evolution
Source: Royal Society of Chemistry journal article supplement (doi:10.1039/d5cc06359k), 2025-12-15
Supplement: d5cc06359k1.pdf [file d5cc06359k1.pdf]

## Supporting information

### Hybridization of preheated cellulose microcrystals with MoS<sub>2</sub> sheets for enhanced piezo-catalytic hydrogen evolution

Hailong Zhang,<sup>a</sup> Jianzhong Guo,<sup>a</sup> Shuying Liang,<sup>a</sup> Hongbo Yu,<sup>\*b</sup> Xianhong Li <sup>\*c</sup> and Chunzheng Wu <sup>\*a</sup> <sup>a</sup> *Zhejiang Key Laboratory of Green and Low-Carbon Utilization Technology of Agricultural and Forestry Biomass, College of Chemistry and Materials Engineering, Zhejiang A&F University, Hangzhou 311300, P. R. China.*

<sup>b</sup> *School of Materials and Chemical Engineering, Ningbo University of Technology, Ningbo 315211, P. R. China*

<sup>c</sup> *Hangzhou Lin'an Huier Molybdenum Industry Science & Technology Co., Ltd., Hangzhou 311300, P. R. China.*

\* Corresponding authors: hongboyu@nbut.edu.cn (H. Yu), lixh6999@163.com (X. Li), wucz@zafu.edu.cn (C. Wu)

## Experimental section

### 1. Chemicals

Microcrystalline cellulose (97%) and thiourea ( $\text{CH}_4\text{N}_2\text{S}$ ,  $\geq 98.0\%$ ) were purchased from MREDA. Ammonium heptamolybdate tetrahydrate ( $(\text{NH}_4)_6\text{Mo}_7\text{O}_{24}\cdot 4\text{H}_2\text{O}$ , AR), glucose ( $\text{C}_6\text{H}_{12}\text{O}_6$ , AR), ethanol ( $\text{C}_2\text{H}_6\text{O}$ , AR), chloroplatinic acid hexahydrate ( $\text{H}_2\text{PtCl}_6\cdot 6\text{H}_2\text{O}$ , AR), methanol ( $\text{CH}_4\text{O}$ , AR), sodium sulfide ( $\text{Na}_2\text{S}$ ,  $\geq 97\%$ ), ascorbic acid ( $\text{C}_6\text{H}_8\text{O}_6$ , AR), and lactic acid ( $\text{C}_3\text{H}_6\text{O}_3$ , AR) were obtained from Sinopharm Group. Triethanolamine ( $\text{C}_6\text{H}_{15}\text{NO}_3$ ) was purchased from Aladdin. Sodium sulfite ( $\text{Na}_2\text{SO}_3$ ,  $\geq 98\%$ ) was purchased from DAMAS.

### 2. Preparations

**Preheated microcrystalline cellulose (CL):** Microcrystalline cellulose (2 g, 97%, MREDA) was placed in a covered crucible and heated in a muffle furnace to 350 °C at a ramp rate of 5 °C min<sup>-1</sup>. The temperature was maintained for 2 h to partially carbonize the surface, yielding the preheated cellulose (CL).

**CL@MoS<sub>2</sub> heterostructures:** 1.24 g of ammonium molybdate tetrahydrate ( $(\text{NH}_4)_6\text{Mo}_7\text{O}_{24}\cdot 4\text{H}_2\text{O}$ ), 2.208 g of thiourea ( $\text{CS}(\text{NH}_2)_2$ ,  $\geq 99.0\%$ ), and 0.15 g of CL were sequentially added to 35 mL of deionized water under ultrasonic agitation for 10 min to form a homogeneous suspension. The mixture was then transferred into a Teflon-lined stainless-steel autoclave and subjected to a hydrothermal reaction at 180 °C for 24 h. After cooling to room temperature, the resulting black precipitate was collected, washed three times with deionized water, and dried at 70 °C in a vacuum oven for 12 h. The obtained CL@MoS<sub>2</sub> composite contained 59.2 wt.% MoS<sub>2</sub> and, unless otherwise specified, is referred to as “CL@MoS<sub>2</sub>” throughout this work. To tune the MoS<sub>2</sub> loading from 36.3 wt.% to 72.2 wt.%, the amount of CL was varied from 1.2 g to 0.05 g while maintaining all other synthesis parameters constant.

### 3. Characterizations

X-ray diffraction (XRD) measurements were carried out on a Shimadzu Lab XRD-6100 diffractometer using Cu K $\alpha$  radiation ( $\lambda = 0.1541$  nm). N<sub>2</sub> adsorption-desorption isotherms were recorded at 77 K using an ASAP2460 analyzer. X-ray photoelectron spectroscopy (XPS) was performed on a Shimadzu/Kratos AXIS SUPRA+ system. Inductively coupled plasma optical emission spectroscopy (ICP-OES) was conducted with an Avio 220 Max. For these measurements,

MoS<sub>2</sub>-containing samples were digested in aqua regia under heating for 4 hours and subsequently filtered to determine the Mo concentration. The MoS<sub>2</sub> loading was calculated assuming that all detected Mo existed in the form of MoS<sub>2</sub>. Piezoelectric force microscopy (PFM) was carried out using a Bruker Dimension Icon.

#### **4. Electrochemical test**

Electrochemical measurements were conducted using a CHI660E workstation equipped with a standard three-electrode configuration in 0.5 M Na<sub>2</sub>SO<sub>4</sub> electrolyte. A platinum wire served as the counter electrode, and a saturated Ag/AgCl electrode was used as the reference. The working electrode was fabricated by dispersing 10 mg of catalyst in 5 mL ethanol containing 80  $\mu$ L of 5 wt.% Nafion solution, followed by 30 min of ultrasonication. Then, 10  $\mu$ L of the resulting ink was drop-cast onto a pre-cleaned FTO glass substrate (1  $\times$  1 cm<sup>2</sup>) and dried at 80  $^{\circ}$ C for 2 h. Piezoelectric current responses were measured by immersing the electrochemical cell in a 160 W ultrasonic bath, recording the i-t curves under periodic on/off cycles. Electrochemical impedance spectroscopy (EIS) was performed at an overpotential of 600 mV in the frequency range of 0.01 Hz to 100 kHz using a 5 mV AC perturbation. Polarization curves for H<sub>2</sub> evolution were recorded by linear sweep voltammetry (LSV) at 5 mV $\cdot$ s<sup>-1</sup>.

#### **5. Piezocatalytic tests**

A total of 10 mg of catalyst powder was dispersed in 20 mL of glucose solution (2.8 molL<sup>-1</sup>) in a 60 mL glass reactor. An appropriate amount of H<sub>2</sub>PtCl<sub>6</sub> solution was then added to achieve a Pt loading of 2 wt.% on the catalyst. The suspension was purged with high-purity argon (99.999 %) for 30 min to remove dissolved oxygen and subsequently sealed with a silicone rubber septum. The reactor was irradiated under a 365 nm UV LED lamp with continuous stirring for 1 h. Afterward, the stirring bar was removed, and the reactor was purged again with pure Ar. The reactor was then placed at the center of an ultrasonic bath operating at 40 kHz and 160 W. To prevent excessive heating, the bath water was refreshed every 15 min to maintain the temperature below 30  $^{\circ}$ C. Gas samples (100  $\mu$ L) were collected hourly using a gas-tight syringe and analyzed for hydrogen content with a gas chromatograph (s-sun GC-9860) equipped with a thermal conductivity detector (TCD).

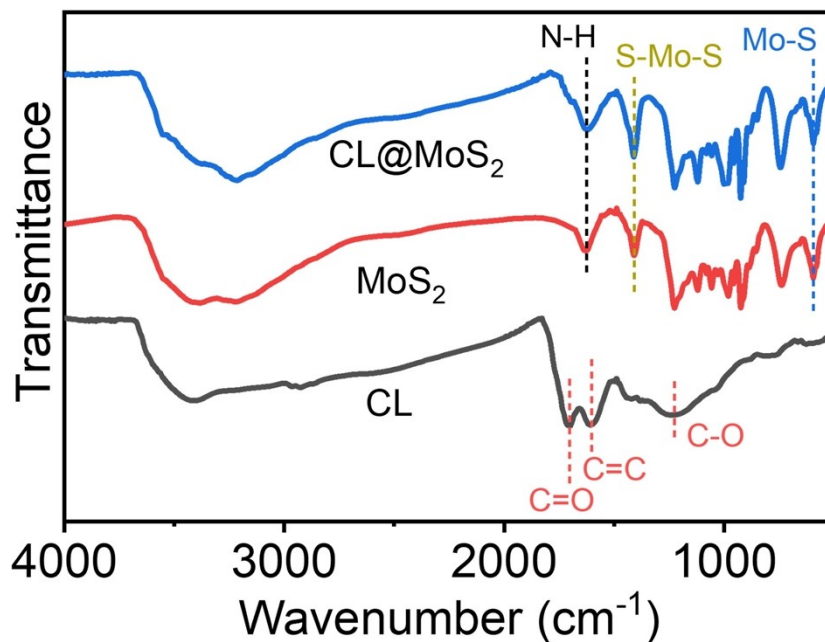

**Fig.S1** FTIR spectra of CL, MoS<sub>2</sub> and CL@MoS<sub>2</sub>. For CL, characteristic peaks appear at 1707, 1601, and 1226 cm<sup>-1</sup>, corresponding to C=O stretching<sup>1</sup>, aromatic C=C stretching<sup>2</sup>, and C-O stretching<sup>3</sup>, respectively. MoS<sub>2</sub> and CL@MoS<sub>2</sub> show similar FTIR features, with a peak at 594 cm<sup>-1</sup> attributed to Mo-S stretching, a peak at 1408 cm<sup>-1</sup> assigned to S-Mo-S stretching<sup>4</sup>, and a band at 1633 cm<sup>-1</sup> arising from N-H bending<sup>5</sup>. Additional peaks between 730-1250 cm<sup>-1</sup> possibly originate from the decomposition products of Mo and S precursors and are difficult to assign unambiguously.

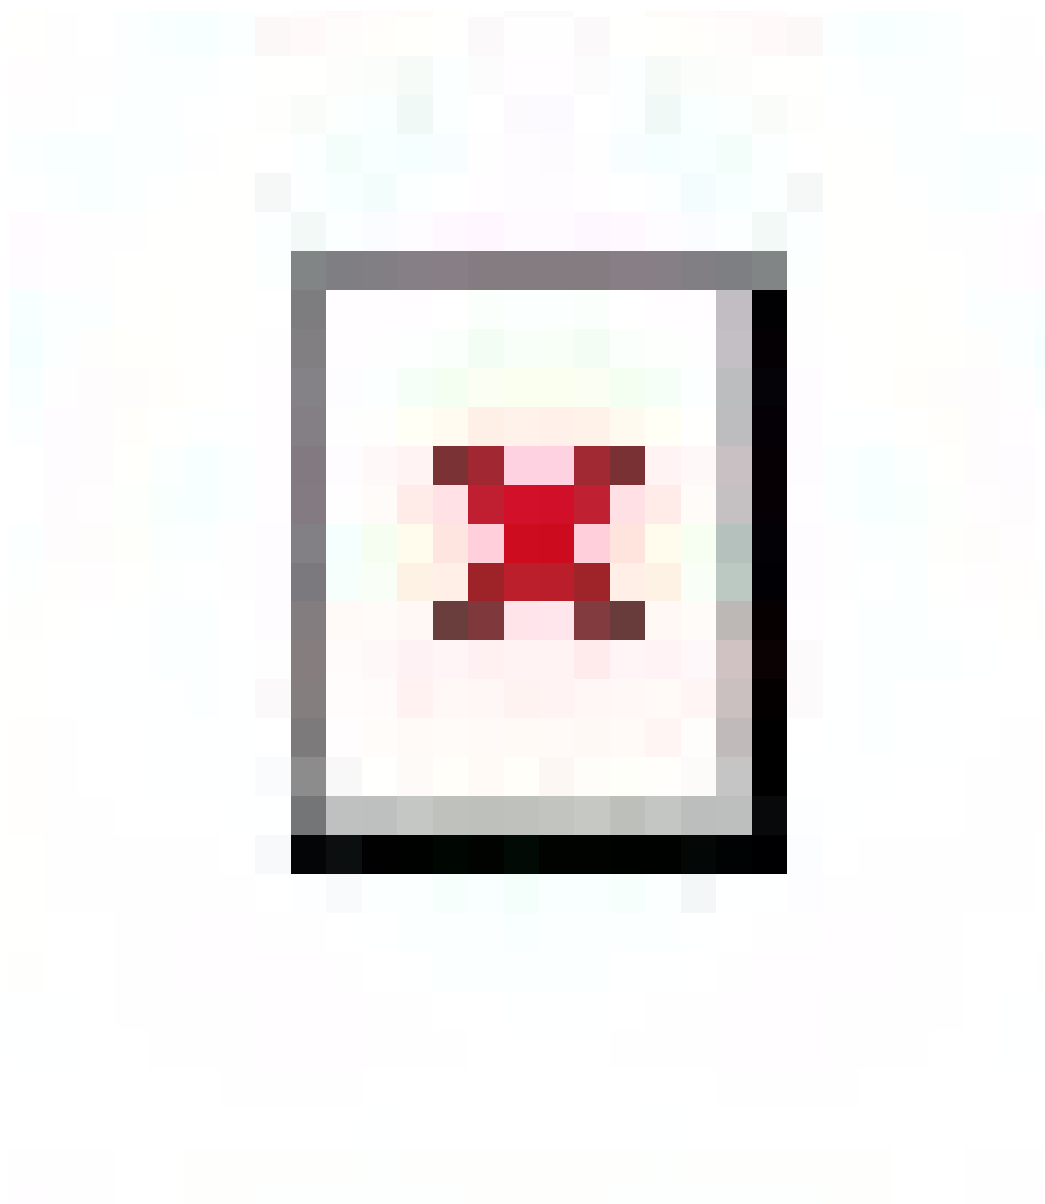

**Fig.S2** Influence of (a) different metal cocatalysts (2 wt.%), (b) Pt loading amounts, (c) glucose solution pH, (d) glucose concentration, and (e-f) catalyst dosage on the H<sub>2</sub> evolution performance of CL@MoS<sub>2</sub>.

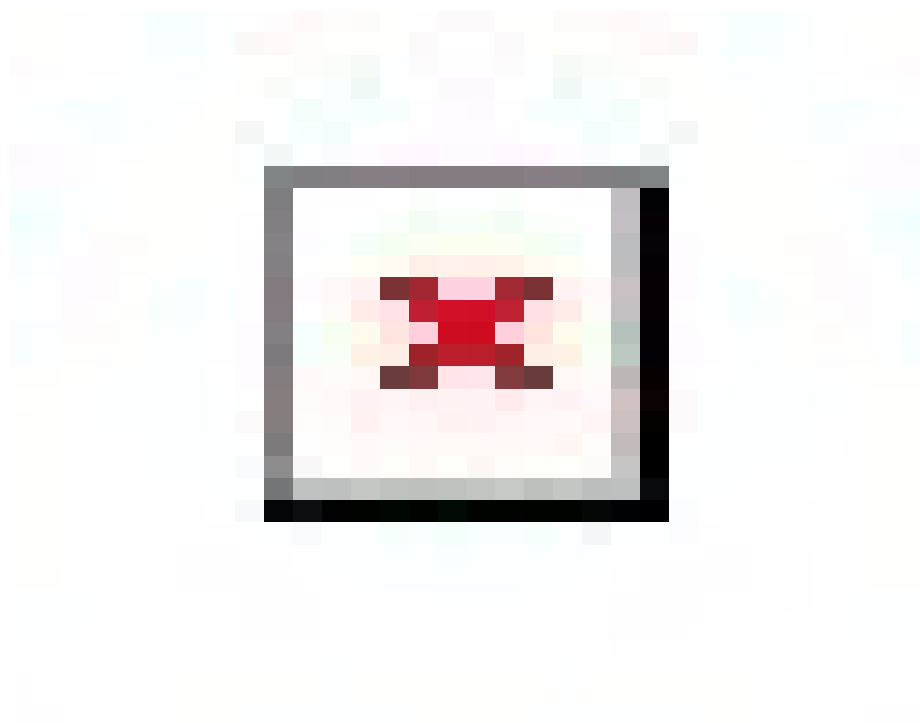

**Fig.S3** (a, b) SEM images and (c, d) corresponding EDS elemental mappings of the CL@MoS<sub>2</sub> sample containing 72.2 wt.% MoS<sub>2</sub>, showing that individual MoS<sub>2</sub> microflowers have grown independently from the CL surface.

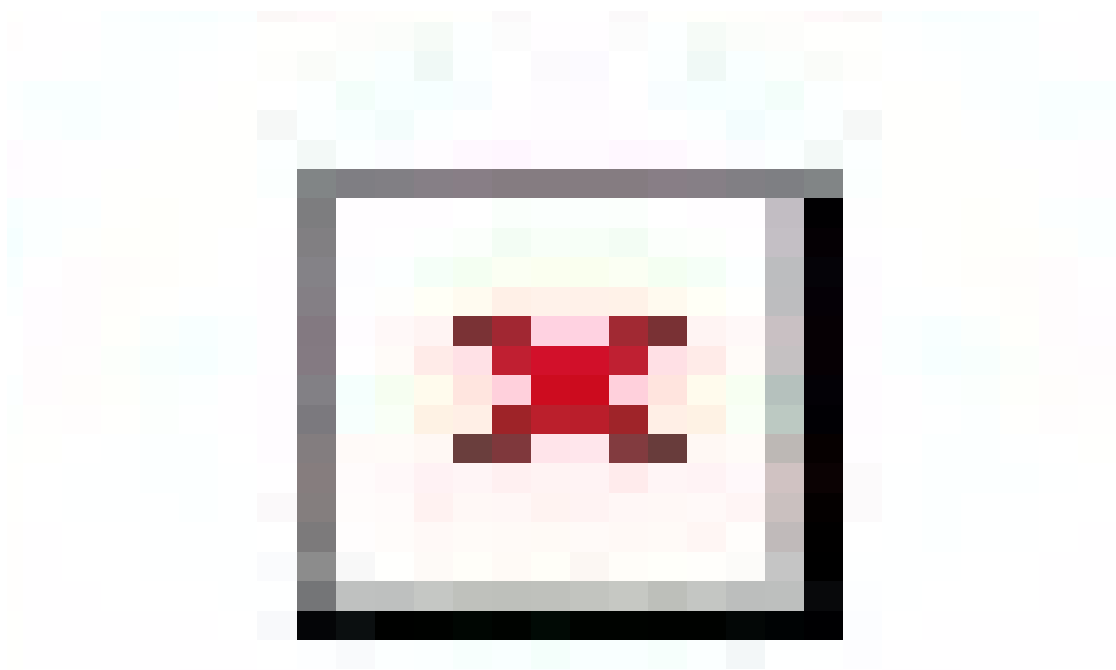

**Fig.S4** (a) XRD patterns and (b) FTIR spectra of CL@MoS<sub>2</sub> before and after the recyclability tests; (b) SEM image and corresponding EDS elemental mappings of CL@MoS<sub>2</sub> following the recyclability tests. For FTIR, a clear decrease in the intensities of the Mo-S and S-Mo-S vibration bands is observed, indicating partial surface oxidation of MoS<sub>2</sub> during long-term operation. This minor oxidation does not affect the long-range bulk crystallinity, as shown by XRD. In addition, most peaks in the 730-1250 cm<sup>-1</sup> region disappear after the reaction, likely due to the removal of residual organic groups (originating from the Mo and S precursors) from the MoS<sub>2</sub> surface during the piezocatalytic test under sonication.

**Table S1.** A comparison of our CL@MoS<sub>2</sub> catalyst with the reported piezocatalysts in H<sub>2</sub> evolution.

| Photocatalyst                                                | HER rate (mmol/g/h) | Sonication    | Conditions                     | Reference                  |
|--------------------------------------------------------------|---------------------|---------------|--------------------------------|----------------------------|
| CL@MoS <sub>2</sub>                                          | ~1.0                | 40 kHz, 160 W | 10 mg / 20 mL<br>Pure water    | This work                  |
|                                                              | 2.96                | 40 kHz, 160 W | 10 mg / 20 mL<br>2.8 M Glucose | This work                  |
|                                                              | ~7                  | 40 kHz, 160 W | 10 mg / 20 mL<br>10 % Methanol | This work                  |
| UT g-C <sub>3</sub> N <sub>4</sub>                           | 8.35                | 40 kHz, 240 W | 2 mg / 100 mL<br>0.1 M Glucose | Hu et al. <sup>6</sup>     |
| 2D Te                                                        | 9                   | 53 kHz, 100 W | 5 mg/100 mL<br>15 % TEOA       | Mishra et al. <sup>7</sup> |
| CdS/BiOCl                                                    | 1.05                | 40 kHz, 120 W | 50 mg / 20 mL<br>20 % Methanol | Hao et al. <sup>8</sup>    |
| Bi <sub>8h</sub> /BiOCl                                      | 2.81                | 40 kHz, 160 W | 10 mg / 20 mL<br>1.4 M Glucose | Su et al. <sup>9</sup>     |
| BiOCl                                                        | 0.98                | 40 kHz, 120 W | 5 mg / 5 mL<br>2 % Methanol    | Long et al. <sup>10</sup>  |
| Bi <sub>2</sub> Fe <sub>4</sub> O <sub>9</sub><br>nanoplates | 5.72                | 40 kHz, 200 W | 2 mg / 10 mL<br>10 % Methanol  | Du et al. <sup>11</sup>    |
| Hollow CaTiO <sub>3</sub><br>Nanocuboids                     | 3.44                | 40 kHz, 250 W | 2 mg / 10 mL<br>10 % Methanol  | Zhou et al. <sup>12</sup>  |
| CN-C <sub>0.025</sub>                                        | 3.92                | 40 kHz, 160 W | 10 mg / 20 mL<br>10 % Methanol | Nie et al. <sup>13</sup>   |
| ZnSnO <sub>3</sub><br>nanowires                              | 3.45                | 40 kHz, 250 W | 10 mg / 10 mL<br>50 % Methanol | Wang et al. <sup>14</sup>  |
| MIL-100(Fe)                                                  | 2.8                 | 40 kHz, 120 W | 5 mg / 5 mL<br>1 % Methanol    | He et al. <sup>15</sup>    |
| MoS <sub>2</sub> @Mo <sub>2</sub> CT <sub>x</sub>            | 1.16                | 40 kHz, 250 W | 10 mg / 10 mL<br>25 % Methanol | Lin et al. <sup>16</sup>   |



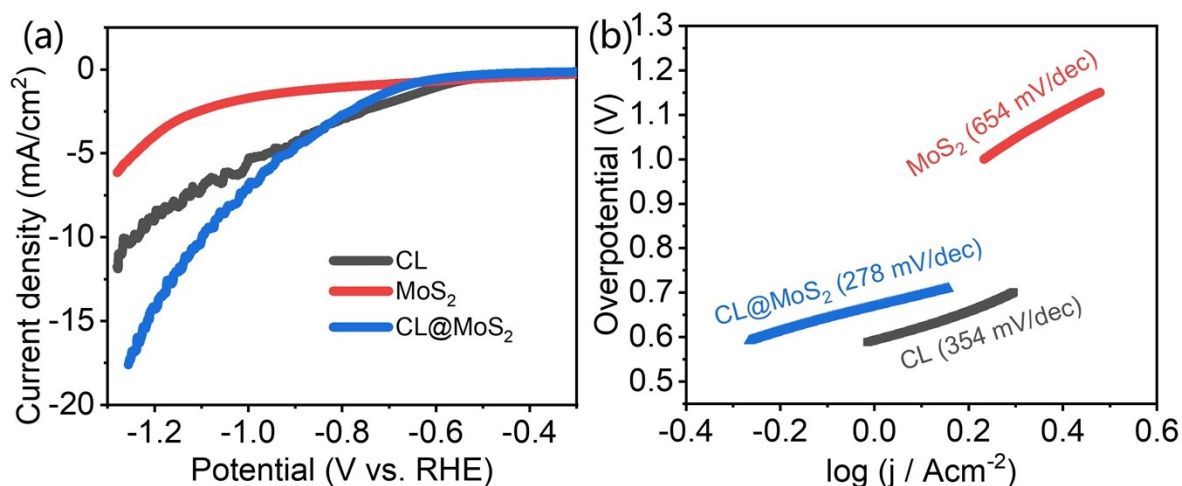

**Fig.S5** (a) LSVs and the corresponding (b) Tafel plots of CL, MoS<sub>2</sub> and CL@MoS<sub>2</sub>. Notably, MoS<sub>2</sub>—despite being a well-known HER catalyst—shows the lowest activity in this system, which may be attributed to factors such as material assembly, active-site exposure, or surface water affinity.

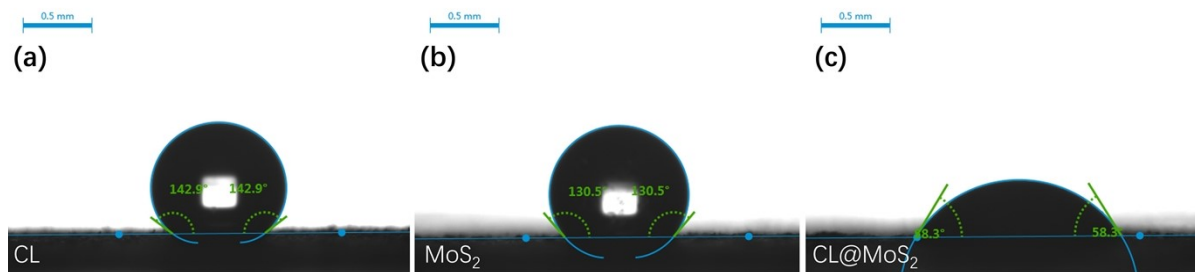

**Fig.S6** Water contact angles of (a) CL, (b) MoS<sub>2</sub> and (c) CL@MoS<sub>2</sub>. Both CL and MoS<sub>2</sub> are hydrophobic, while the CL@MoS<sub>2</sub> heterostructure shows a much lower contact angle of 58°, indicating markedly enhanced hydrophilicity. The underlying cause of this unexpected behavior is unclear but may be related to changes in surface morphology or the presence of surface defects.

## Reference

1. E. Fumoto, S. Sato, Y. Kawamata, Y. Koyama, T. Yoshikawa, Y. Nakasaka, T. Tago and T. Masuda, *Fuel*, 2022, **318**, 123530.
2. M. K. Trivedi, S. Patil, H. Shettigar, K. Bairwa and S. Jana, *Medicinal Chemistry*, 2015, **5**, 340-344.
3. B. Mohebbi, *Journal of Agricultural Science and Technology*, 2010, **10**, 253-259.
4. M. E. M. Ali, R. Mohammed, S. M. Abdel-Moniem, M. A. El-Liethy and H. S. Ibrahim, *Journal of Nanoparticle Research*, 2022, **24**, 191.
5. Y. Jiang, Y. Li, C. Richard, D. Scherman and Y. Liu, *Journal of Materials Chemistry B*, 2019, **7**, 3796-3803.
6. C. Hu, F. Chen, Y. Wang, N. Tian, T. Ma, Y. Zhang and H. Huang, *Advanced Materials*, 2021, **33**, 2101751.
7. H. K. Mishra, Ankush, N. Barman, B. Mondal, M. Jha, R. Thapa and D. Mandal, *Small*, 2024, **20**, 2402421.
8. P. Hao, Y. Cao, X. Ning, R. Chen, J. Xie, J. Hu, Z. Lu and A. Hao, *Journal of Colloid and Interface Science*, 2023, **639**, 343-354.
9. F. Su, J. Nie, H. Yu, S. Yue, J. Guo and C. Wu, *Inorganic Chemistry*, 2025, **64**, 9195-9203.
10. Y. Long, H. Xu, J. He, C. Li and M. Zhu, *Surfaces and Interfaces*, 2022, **31**, 102056.
11. Y. Du, T. Lu, X. Li, Y. Liu, W. Sun, S. Zhang and Z. Cheng, *Nano Energy*, 2022, **104**, 107919.
12. H. Zhou, J. Cao, Y. Ji, M. Xia and W. Yao, *Small*, 2024, **20**, 2402679.
13. J. Nie, S. Yue, B. Li, J. Guo and C. Wu, *Ceramics International*, 2025, **51**, 31370-31377.
14. Y.-C. Wang and J. M. Wu, *Advanced Functional Materials*, 2020, **30**, 1907619.
15. J. He, Z. Yi, Q. Chen, Z. Li, J. Hu and M. Zhu, *Chemical Communications*, 2022, **58**, 10723-10726.
16. H.-Y. Lin and J. M. Wu, *Advanced Energy Materials*, 2024, **14**, 2402164.
